# Supplementary material for: Power generation from the Cu26Nb2Ge6S32-based single thermoelectric element with Au diffusion barrier
Source: Royal Society of Chemistry journal article supplement (doi:10.1039/c9tc00868c), 2019-01-01
Supplement: c9tc00868c1.pdf [file c9tc00868c1.pdf]

Electronic supplementary information

**Power generation from the  $\text{Cu}_{26}\text{Nb}_2\text{Ge}_6\text{S}_{32}$ -based single thermoelectric  
element with Au diffusion barrier**

Raju Chetty<sup>a</sup>, Yuta Kikuchi<sup>a</sup>, Yohan Bouyrie<sup>a</sup>, Priyanka Jood<sup>a</sup>, Atsushi Yamamoto<sup>a</sup>,

Koichiro Suekuni<sup>b</sup>, and Michihiro Ohta<sup>a\*</sup>

*<sup>a</sup> Research Institute for Energy Conservation, National Institute of Advanced Industrial Science  
and Technology (AIST), Tsukuba, Ibaraki 305-8568, Japan*

*<sup>b</sup> Department of Applied Science for Electronics and Materials, Interdisciplinary Graduate  
School of Engineering Sciences, Kyushu University, Kasuga, Fukuoka 816-8580, Japan*

\*Corresponding Author: Michihiro Ohta

Email: ohta.michihiro@aist.go.jp

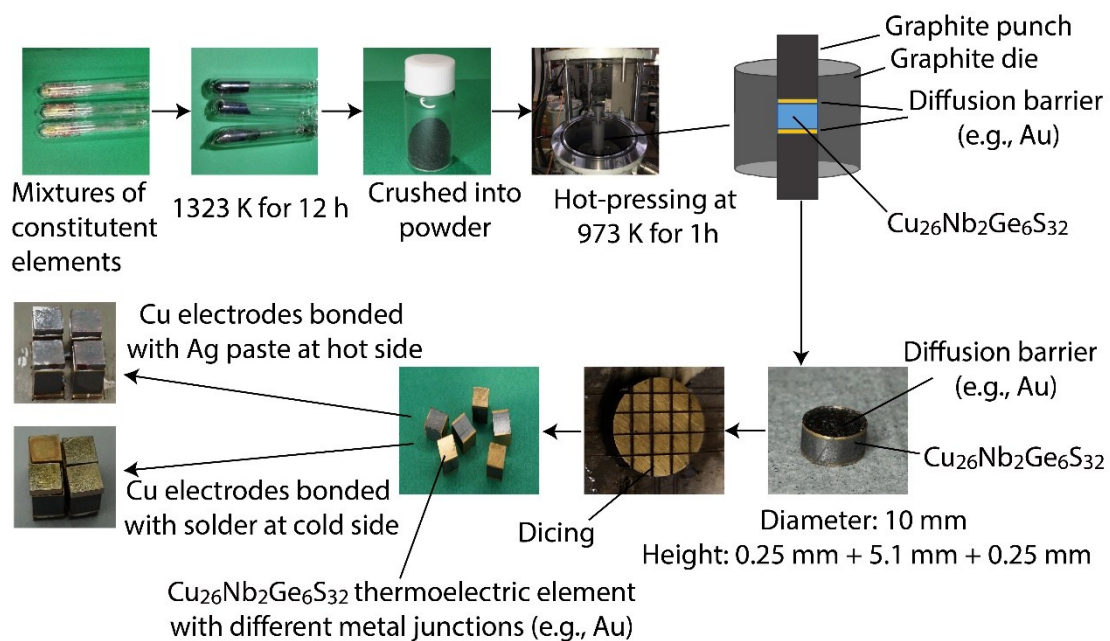

**Figure S1**

Preparation of Cu<sub>26</sub>Nb<sub>2</sub>Ge<sub>6</sub>S<sub>32</sub> thermoelectric elements with different metal junctions.

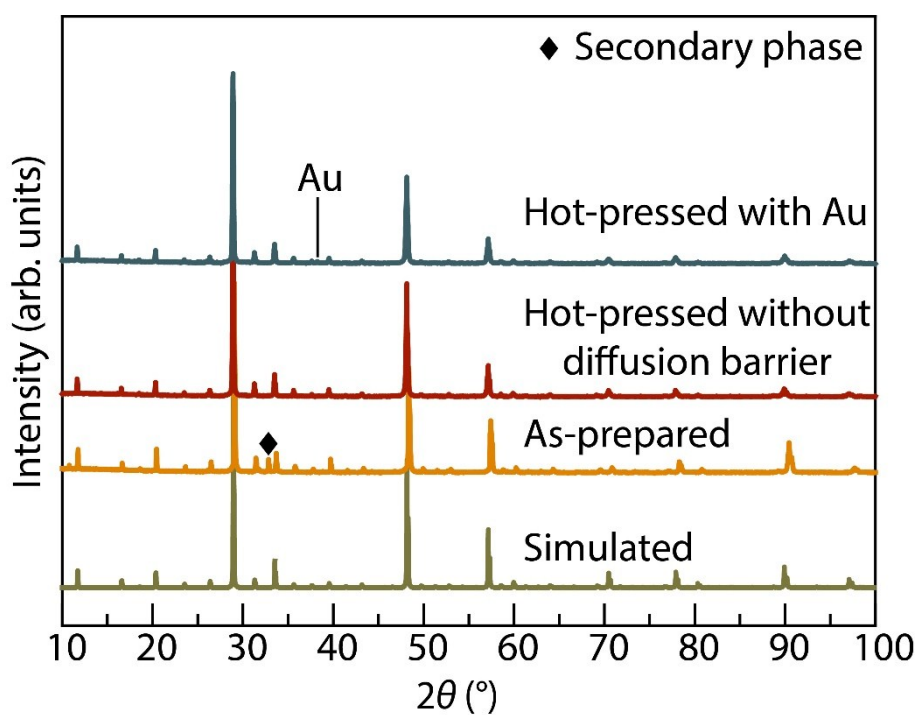

**Figure S2**

Powder X-ray diffraction patterns of simulated, as-prepared  $\text{Cu}_{26}\text{Nb}_2\text{Ge}_6\text{S}_{32}$ , hot-pressed  $\text{Cu}_{26}\text{Nb}_2\text{Ge}_6\text{S}_{32}$  without diffusion barrier, and hot-pressed  $\text{Cu}_{26}\text{Nb}_2\text{Ge}_6\text{S}_{32}$  with Au over the range of  $10^\circ$ – $100^\circ$ .

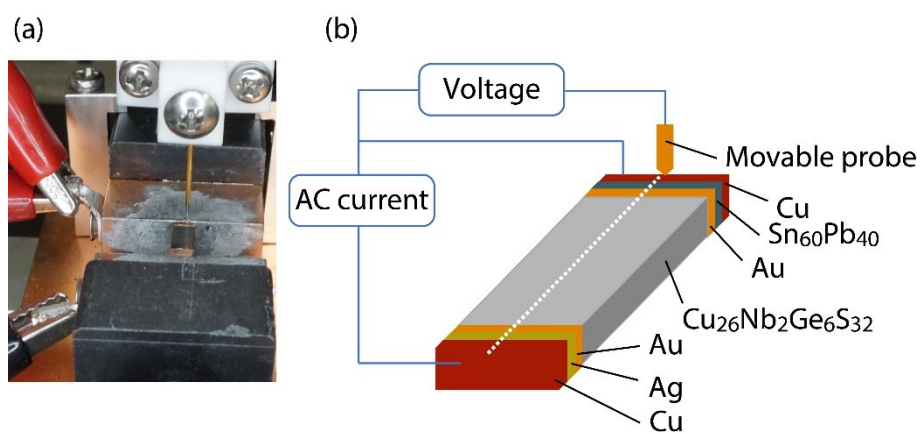

**Figure S3**

(a) Photograph of sample mounted and (b) a schematic diagram for the electrical resistance ( $R$ ) measurement setup.

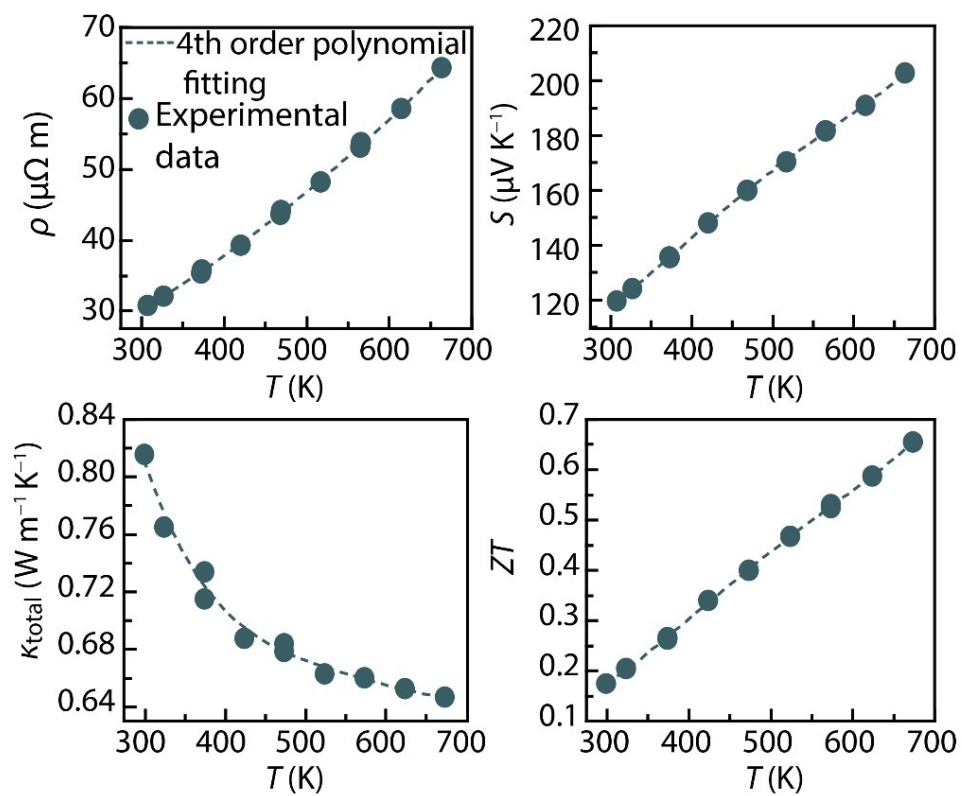

**Figure S4**

Fourth order polynomial fittings of temperature dependent electrical resistivity ( $\rho$ ), Seebeck coefficient ( $S$ ), total thermal conductivity ( $\kappa_{\text{total}}$ ) and thermoelectric figure of merit ( $ZT$ ).

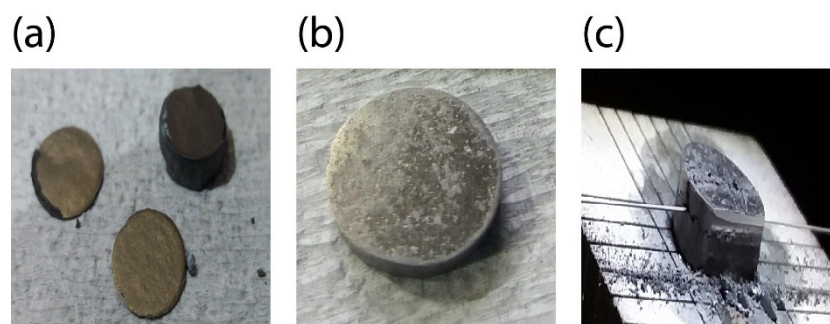

**Figure S5**

(a) Hot-pressed sample of Ti foil/ $\text{Cu}_{26}\text{Nb}_2\text{Ge}_6\text{S}_{32}$ /Ti foil after hot pressing at 973 K. Ti foil was peeled off. (b) hot-pressed sample of Ti powder/ $\text{Cu}_{26}\text{Nb}_2\text{Ge}_6\text{S}_{32}$ /Ti powder after hot pressing at 973 K. (c) The Ti layer peeled off during the dicing.

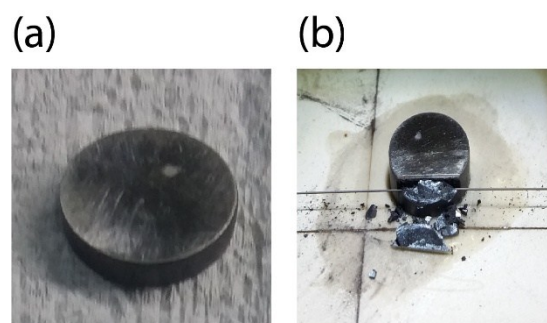

**Figure S6**

(a) Hot-pressed sample of Pt foil/ $\text{Cu}_{26}\text{Nb}_2\text{Ge}_6\text{S}_{32}$ /Pt foil after hot pressing at 973 K. (b) The Pt layer was peeled off during the dicing.

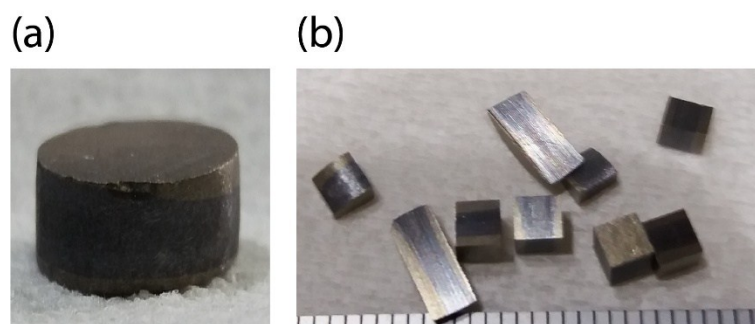

**Figure S7**

(a) Hot-pressed sample of Ni powder/Cu<sub>26</sub>Nb<sub>2</sub>Ge<sub>6</sub>S<sub>32</sub>/Ni powder sample after hot pressing at 923

K. (b) Hot pressed elements of Ni powder/Cu<sub>26</sub>Nb<sub>2</sub>Ge<sub>6</sub>S<sub>32</sub>/Ni powder after dicing.

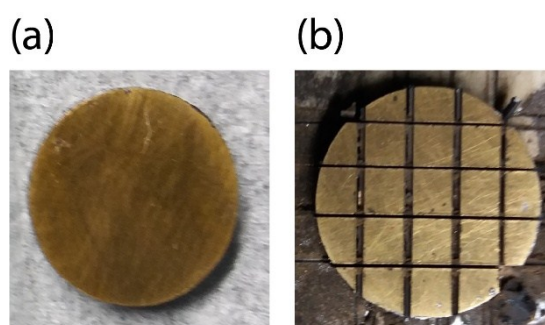

**Figure S8**

(a) Hot-pressed sample of Au foil/Cu<sub>26</sub>Nb<sub>2</sub>Ge<sub>6</sub>S<sub>32</sub>/Au foil after hot pressing at 973 K.(b) Hot

pressed elements of Au foil/Cu<sub>26</sub>Nb<sub>2</sub>Ge<sub>6</sub>S<sub>32</sub>/Au foil after the dicing.

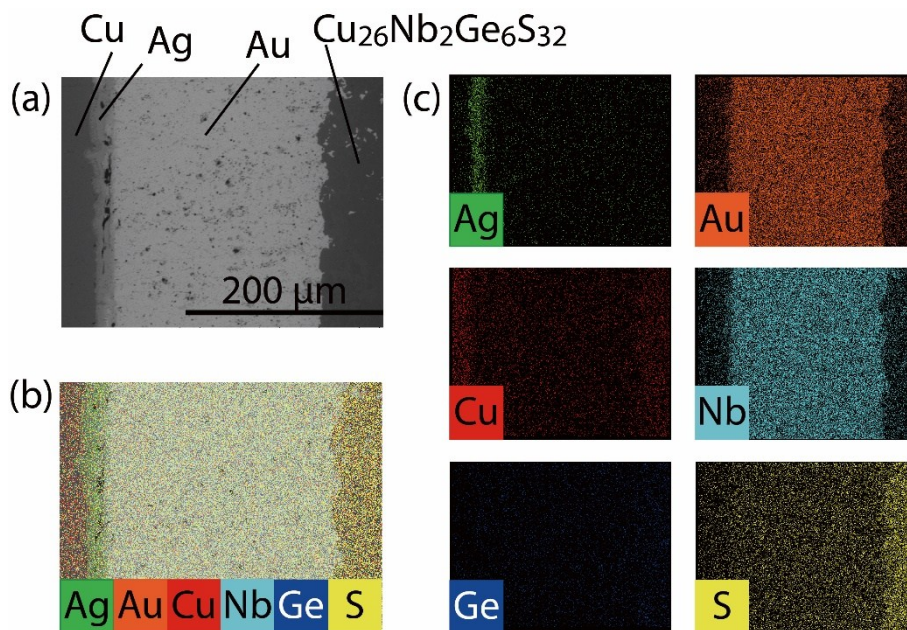

**Figure S9**

(a) Scanning electron microscopy backscattered electron (SEM-BSE) image of Cu/Ag/Au/ $\text{Cu}_{26}\text{Nb}_2\text{Ge}_6\text{S}_{32}$  interface in hot side, and (c) and (d) the corresponding X-ray maps of Cu, Ag, Au and  $\text{Cu}_{26}\text{Nb}_2\text{Ge}_6\text{S}_{32}$ . Note that the energy of Nb  $L\alpha_1 = 2.169$  keV is close to the energy of Au  $M\alpha_1 = 2.123$  keV.



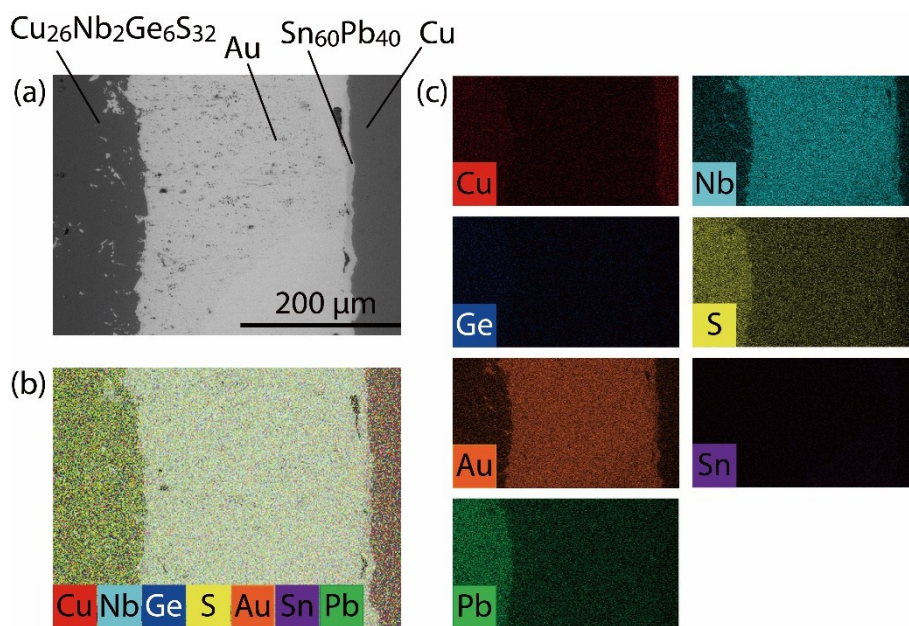

**Figure S10**

(a) Scanning electron microscopy backscattered electron (SEM-BSE) image of  $\text{Cu}_{26}\text{Nb}_2\text{Ge}_6\text{S}_{32}/\text{Au}/\text{Sn}_{60}\text{Pb}_{40}/\text{Cu}$  interface in cold side, and (c) and (d) the corresponding X-ray maps of Au,  $\text{Cu}_{26}\text{Nb}_2\text{Ge}_6\text{S}_{32}$ , Sn, Pb and Cu. Note that the energy of  $\text{S } K\alpha_1 = 2.309 \text{ keV}$  is close to the energy of  $\text{Pb } M\alpha_1 = 2.342 \text{ keV}$ .

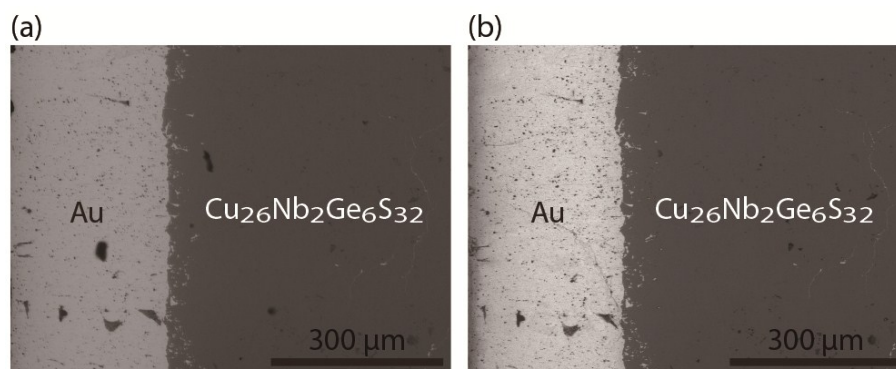

**Figure S11**

Scanning electron microscopy backscattered electron (SEM-BSE) image of Au/Cu<sub>26</sub>Nb<sub>2</sub>Ge<sub>6</sub>S<sub>32</sub> interface at the hot side of thermoelectric element (a) before and (b) after the temperature gradient treatment, respectively.
